# Supplementary material for: Uncovering the Mechanisms of Active Components from Toad Venom against Hepatocellular Carcinoma Using Untargeted Metabolomics
Source: MDPI journal article supplement (doi:10.3390/molecules27227758), 2022-11-10
Supplement: s1 [file s1]

# Uncovering the Mechanisms of Active Components from Toad Venom against Hepatocellular Carcinoma Using Untargeted Metabolomics

Pan Liang<sup>1,2,3</sup>, Yining Ma<sup>1,3</sup>, Luyin Yang<sup>1,3</sup>, Linshen Mao<sup>1,3</sup>, Qin Sun<sup>1,3</sup>, Changzhen Sun<sup>1,3</sup>, Zengjin Liu<sup>1,3</sup>, Maryam Mazhar<sup>1,3</sup>, Sijin Yang<sup>1,2,3,\*</sup> and Wei Ren<sup>1,3,\*</sup>

<sup>1</sup> National Traditional Chinese Medicine Clinical Research Base, Drug Research Center of Integrated Traditional Chinese and Western Medicine, The Affiliated Traditional Chinese Medicine Hospital of Southwest Medical University, Luzhou 646000, China

<sup>2</sup> State Key Laboratories for Quality Research in Chinese Medicines, Faculty of Chinese Medicine, Macau University of Science and Technology, Macau 853, China

<sup>3</sup> Institute of Integrated Chinese and Western Medicine, Southwest Medical University, Luzhou 646000, China

## Experimental Section

### *In vivo compounds identification of toad venom in rat plasma*

Toad venom extract with the concentration of 1 mg/mL was prepared according to our previous report [13]. Male Sprague-Dawley (SD) rats weighted 200-220 g were purchased from Beijing Vital River Laboratory Animal Technology Co., Ltd. (Beijing, China) and housed at constant temperature and humidity environment. Before the experiment, the rats were fasted for 12 h. After taking blank blood, rats were orally administrated toad venom extract with the dose of 300 mg/kg. The blood samples were collected from the eye sockets of rats after 0.5, 1, 2, 4, 6, 8, 12, and 24 h, respectively. Subsequently, all blood samples were immediately centrifuged at 4000 rpm for 10 min at 4 °C, and the upper plasma were collected and stored at -80 °C. Further, 100 µL medicated plasma obtained from each time point were mixed and added with 3-fold methanol to precipitate protein. Then, the mixture was centrifuged at 12000 rpm for 20 min at 4 °C. The supernatant was blow-dried with nitrogen and subsequently redissolved with 100 µL methanol/water solution (1:1, v/v). Meanwhile, blank plasma was also treated with same procedure.

### *UHPLC-MS/MS detection conditions of toad venom in rat plasma*

The ultimate 3000 hyperbaric LC system connected with high-resolution Q-Exactive Orbitrap mass system (UHPLC-HR-Q-Exactive Orbitrap MS, Thermo Fisher Scientific, USA) was applied for qualitative analysis of compounds. In chromatographic system, the CSH C18 column (2.1\*100 mm, 1.7 µm, Waters) was used for the separation of chemical compounds in samples. The column temperature was 35 °C. The mobile phase was composed of solvent A (water containing 0.1% formic acid) and B (acetonitrile). At a 0.1 mL/min flow rate, the injection volume was kept at 3 µL. The gradient elution conditions optimized: 0-3 min, 2% B; 3-5 min, 2-28% B; 5-12 min, 28% B; 12-22 min, 28-35% B; 22-30 min, 35-100% B; 30-32 min, 100% B; 32-35 min, 2%B.

The parameters of mass spectrometry in positive mode were optimized as follows. Capillary voltage and temperature: 3 kV, 320 °C; sheath gas flow: 30; aux gas flow: 5; Mass scan range: m/z 100-1500 Da, resolution: 30000. All MS data were imported into Xcalibur 4.4 software to complete the extraction of chromatographic peaks and fragmentation behavior information. Mass error was set as less than 5 ppm.

### *H&E staining*

H&E staining were used to detect the cell morphology after treatments. The excised tumors were fixed in tissue fixative for at least 24 h and sliced after embedded with paraffin. Then the slices were observed under microscope (CIC, XSP-C204) and photographed randomly at 200-fold field.

### Ki-67 staining

The excised tumors were fixed in tissue fixative over 24 h and sliced after embedded with paraffin. The cell proliferation of tumor slices was evaluated by Ki-67 staining. The primary antibody was Ki-67 monoclonal antibody (dilution 1:1000, Chengdu Lilai Biotechnology Co., Ltd.), and HRP-labeled goat antirabbit IgG (dilution 1:3000, Chengdu Lilai Biotechnology Co., Ltd.) was used as the secondary antibody. The blue nuclei of total normal cells were stained by hematoxylin and the brown nuclei of proliferated cells were stained by DAB chromogenic agent.

### TUNEL staining

Tumor tissues were fixed, embedded, sliced, and performed by using TUNEL staining kit according to the product introduction manual.

**Table S1.** MS2 fragment of 27 compounds from toad venom extract detected in rat plasma.

| No | Type | Chemical formula                                              | Error (ppm) | [M+H] <sup>+</sup> measured mass | MS <sup>2</sup> fragments                                                               | Compound                            |
|----|------|---------------------------------------------------------------|-------------|----------------------------------|-----------------------------------------------------------------------------------------|-------------------------------------|
| 1  | M    | C <sub>19</sub> H <sub>27</sub> O <sub>7</sub> N <sub>2</sub> | -0.399      | 395.18112                        | 371.0842、336.10825、 <b>219.14949</b> 、160.07590                                         | Bufotenidine-5-O-glucuronide        |
| 2  | P    | C <sub>13</sub> H <sub>19</sub> O <sub>2</sub> N <sub>2</sub> | -0.020      | 219.14917                        | 189.10678、 <b>160.07587</b> 、142.72940                                                  | Bufotenidine                        |
| 3  | P    | C <sub>13</sub> H <sub>25</sub> O <sub>5</sub> N <sub>4</sub> | -1.060      | 317.18185                        | 299.04590、289.06152、 <b>271.05081</b> 、264.13458、239.13916、175.11900                    | Pitneloyl arginine                  |
| 4  | P    | C <sub>14</sub> H <sub>27</sub> O <sub>5</sub> N <sub>4</sub> | -0.533      | 331.19702                        | 314.17133、296.16074、 <b>278.15018</b> 、250.15533、175.11903、158.09248                    | Suberoyl arginine                   |
| 5  | M    | C <sub>24</sub> H <sub>33</sub> O <sub>7</sub>                | -1.546      | 433.22128                        | <b>415.21231</b> 、397.20132、379.19077、361.18030、351.19583、333.18530                     | 1-hydroxylarenobufagin              |
| 6  | M    | C <sub>24</sub> H <sub>33</sub> O <sub>7</sub>                | -1.477      | 433.22131                        | 415.21191、397.20108、379.19067、 <b>361.18027</b> 、351.19565、333.18515                    | 5-hydroxylarenobufagin              |
| 7  | M    | C <sub>24</sub> H <sub>33</sub> O <sub>7</sub>                | -1.200      | 433.22153                        | <b>415.21216</b> 、397.20117、379.19064、351.19577、333.18524                               | 16-hydroxylarenobufagin             |
| 8  | M    | C <sub>24</sub> H <sub>35</sub> O <sub>7</sub>                | -0.490      | 435.23709                        | 417.22852、399.21710、 <b>381.20654</b> 、363.19620、345.18542、317.19049、285.18533          | Hydratalbufarenogin                 |
| 9  | P    | C <sub>24</sub> H <sub>35</sub> O <sub>6</sub>                | -1.491      | 419.24234                        | 401.22281、383.22287、 <b>365.21228</b> 、347.20157、269.19019、251.17963                    | 11 $\alpha$ -hydroxytelocinobufagin |
| 10 | P    | C <sub>24</sub> H <sub>33</sub> O <sub>6</sub>                | -1.522      | 417.22638                        | <b>399.21680</b> 、381.20599、363.19565、353.21115、335.20068、317.19000、255.10147、213.16382 | $\Psi$ -Bufarenogin                 |
| 11 | P    | C <sub>24</sub> H <sub>35</sub> O <sub>5</sub>                | -1.837      | 403.24756                        | 385.23831、367.22766、 <b>349.21701</b> 、321.22202、253.19568                              | Gamabufotalin                       |
| 12 | P    | C <sub>24</sub> H <sub>33</sub> O <sub>6</sub>                | 0.539       | 417.22726                        | 399.21732、381.20679、 <b>363.19623</b> 、345.18558、335.20120、249.16418                    | Bufarenogin                         |
| 13 | P    | C <sub>24</sub> H <sub>35</sub> O <sub>5</sub>                | -0.101      | 403.24799                        | 385.2384、367.22781、 <b>349.21713</b> 、331.20660、253.19582                               | 19-hydroxybufalin                   |
| 14 | P    | C <sub>24</sub> H <sub>33</sub> O <sub>6</sub>                | -1.522      | 417.22733                        | <b>399.21689</b> 、381.20621、363.19574、335.20081、317.19022、289.19516、255.10167、213.16386 | Arenobufagin                        |
| 15 | P    | C <sub>24</sub> H <sub>35</sub> O <sub>5</sub>                | -0.324      | 403.24774                        | 385.23831、367.22766、 <b>349.21701</b> 、271.20624、253.19569、215.17986                    | Desacetylbufotalin                  |
| 16 | P    | C <sub>24</sub> H <sub>35</sub> O <sub>6</sub>                | 0.035       | 419.24289                        | <b>401.23331</b> 、383.22275、365.21213、347.20154、269.19077、213.16432                     | Hellebrigenol                       |
| 17 | P    | C <sub>24</sub> H <sub>33</sub> O <sub>6</sub>                | -0.132      | 417.22711                        | 399.21759、381.20703、363.19641、 <b>335.20139</b> 、213.16420                              | Hellebrigenin                       |
| 18 | P    | C <sub>24</sub> H <sub>31</sub> O <sub>6</sub>                | -1.241      | 415.21106                        | 397.20142、379.19083、 <b>351.19595</b> 、333.18546、283.16968、237.16400                    | Bufotalinin                         |
| 19 | P    | C <sub>24</sub> H <sub>35</sub> O <sub>5</sub>                | -0.101      | 403.24774                        | 385.23828、 <b>367.22769</b> 、349.21713、253.19576、215.1799                               | Telocinobufagin                     |
| 20 | P    | C <sub>26</sub> H <sub>35</sub> O <sub>7</sub>                | -0.784      | 459.23801                        | <b>441.25177</b> 、381.20599、363.19638、345.18564、335.20007                               | Cinobufaginol                       |
| 21 | P    | C <sub>24</sub> H <sub>33</sub> O <sub>5</sub>                | -0.901      | 401.23135                        | 383.22241、 <b>365.21188</b> 、347.20129、337.21701、251.17996、215.17982                    | Desacetylcinobufagin                |
| 22 | P    | C <sub>24</sub> H <sub>35</sub> O <sub>4</sub>                | -1.178      | 387.25244                        | 369.24249、 <b>351.23184</b> 、333.22125、305.22629、255.21085                              | Bufalin                             |
| 23 | P    | C <sub>24</sub> H <sub>33</sub> O <sub>4</sub>                | -0.950      | 385.23697                        | <b>367.22766</b> 、349.21704、339.23270、321.22208、253.19574                               | Resibufogenin                       |

|    |   |                                                     |        |           |                                                                                |                             |
|----|---|-----------------------------------------------------|--------|-----------|--------------------------------------------------------------------------------|-----------------------------|
| 24 | P | C <sub>26</sub> H <sub>35</sub> O <sub>6</sub>      | -0.265 | 443.24225 | 401.23254、383.22198、 <b>365.21167</b> 、347.20099、319.20587、251.17960、215.17966 | Cinobufagin                 |
| 25 | M | C <sub>17</sub> H <sub>27</sub> O <sub>2</sub>      | -1.013 | 263.20032 | <b>245.19022</b> 、227.17964、203.17963、161.13255、149.13257                      | Unknown                     |
| 26 | M | C <sub>31</sub> H <sub>41</sub> O <sub>1</sub><br>2 | -0.076 | 605.45453 | <b>587.44604</b> 、569.43524、551.42450、493.33142、457.30991、251.17946            | Cinobufagin-3-O-glucuronide |
| 27 | M | C <sub>20</sub> H <sub>33</sub> O <sub>2</sub>      | -1.824 | 305.24695 | <b>287.23721</b> 、269.22653、249.18501、235.16943、221.15375、177.16383、121.10121  | Unknown                     |

**Table S2.** Details of differential metabolites of HepG2 cell xenograft tumor among different groups compared with control group.

| No | Groups     | adduct                      | Name                                          | VIP             | Fold change     | p-value         | SuperClass                              | Class                               | Trend |
|----|------------|-----------------------------|-----------------------------------------------|-----------------|-----------------|-----------------|-----------------------------------------|-------------------------------------|-------|
| 1  | Buf vs NS  | [M+H] <sup>+</sup>          | 3-methylhistidine                             | 3.7767262<br>51 | 2.49726166<br>1 | 0.0001546<br>06 | Organic acids and derivatives           | Carboxylic acids and derivatives    | up    |
| 2  | Buf vs NS  | [M+H] <sup>+</sup>          | Hyochoolic acid                               | 1.5619402<br>5  | 0.74886245<br>7 | 0.0032924<br>16 | Lipids and lipid-like molecules         | Steroids and steroid derivatives    | down  |
| 3  | Buf vs NS  | [M+H-C6 H11NO] <sup>+</sup> | L-leucyl-L-leucine methyl ester               | 1.1049361<br>26 | 1.39803072<br>4 | 0.0100029<br>56 | Organic acids and derivatives           | Carboxylic acids and derivatives    | up    |
| 4  | Buf vs NS  | [M+H] <sup>+</sup>          | Pipamperone                                   | 1.0110336<br>02 | 1.26222338<br>6 | 0.0102548<br>65 | Organic oxygen compounds                | Organooxygen compounds              | up    |
| 5  | Buf vs NS  | (M+H) <sup>+</sup>          | 1-Methylhistamine                             | 3.4550601<br>85 | 0.61801520<br>7 | 0.0123915<br>68 | Organic nitrogen compounds              | Organonitrogen compounds            | down  |
| 6  | Buf vs NS  | [M+H] <sup>+</sup>          | Niacinamide                                   | 28.924557<br>2  | 1.19975509<br>8 | 0.0141297<br>86 | Organoheterocyclic compounds            | Pyridines and derivatives           | up    |
| 7  | Buf vs NS  | [M+H] <sup>+</sup>          | Mandelonitrile                                | 5.0837770<br>88 | 1.54404592      | 0.0157295<br>02 | Benzenoids                              | Benzene and substituted derivatives | up    |
| 8  | Buf vs NS  | [M+H] <sup>+</sup>          | Heptadecasphinganine                          | 3.9984508<br>45 | 1.28120152<br>7 | 0.0200773<br>6  | Organic nitrogen compounds              | Organonitrogen compounds            | up    |
| 9  | Buf vs NS  | [M+H] <sup>+</sup>          | 5-methylcytidine                              | 4.7456992<br>78 | 1.62533587<br>3 | 0.0205450<br>94 | Nucleosides, nucleotides, and analogues | Pyrimidine nucleosides              | up    |
| 10 | Buf vs NS  | (M+H-H2O) <sup>+</sup>      | Succinic semialdehyde                         | 1.6709773<br>84 | 1.18439540<br>9 | 0.0274277<br>47 | /                                       | /                                   | up    |
| 11 | Buf vs NS  | [M+H] <sup>+</sup>          | 7-hydroxymitragnine                           | 1.3426870<br>78 | 0.58567841<br>6 | 0.0296861<br>38 | /                                       | /                                   | down  |
| 12 | Buf vs NS  | (M+H) <sup>+</sup>          | S-Methyl-5'-thioadenosine                     | 4.8273345<br>97 | 1.21838995<br>2 | 0.0312780<br>23 | Nucleosides, nucleotides, and analogues | 5'-deoxyribonucleosides             | up    |
| 13 | Buf vs NS  | [M+H] <sup>+</sup>          | Nudifloramide                                 | 5.6713605<br>15 | 1.6070879       | 0.0345224<br>12 | Organoheterocyclic compounds            | Pyridines and derivatives           | up    |
| 14 | Buf vs NS  | [M+H-2H2O] <sup>+</sup>     | Taurocholate                                  | 1.7032275<br>19 | 0.51516811<br>4 | 0.0356102<br>87 | Lipids and lipid-like molecules         | Steroids and steroid derivatives    | down  |
| 15 | Buf vs NS  | [M+H-CH5N3] <sup>+</sup>    | Arcaine                                       | 1.0146123<br>37 | 0.74544377<br>2 | 0.0410930<br>46 | Organic nitrogen compounds              | Organonitrogen compounds            | down  |
| 16 | Buf vs NS  | [M+H] <sup>+</sup>          | Pantetheine                                   | 1.1472026<br>04 | 1.67779631<br>5 | 0.0421190<br>83 | Organic acids and derivatives           | Carboxylic acids and derivatives    | up    |
| 17 | Buf vs NS  | [M+H] <sup>+</sup>          | Pro-Trp                                       | 4.7446793<br>55 | 0.45801518<br>5 | 0.0446316<br>54 | Organic nitrogen compounds              | Organonitrogen compounds            | down  |
| 18 | Buf vs NS  | [M-H] <sup>-</sup>          | Pg 34:2                                       | 1.2825277<br>68 | 1.33300909<br>7 | 0.0251920<br>2  | Lipids and lipid-like molecules         | Glycerophospholipids                | up    |
| 19 | Buf vs NS  | [M-H] <sup>-</sup>          | Dihydroxyacetone                              | 1.7566886<br>98 | 1.88550805<br>2 | 0.0330421<br>66 | Organic oxygen compounds                | Organooxygen compounds              | up    |
| 20 | Buf vs NS  | [M-H-NH3] <sup>-</sup>      | 1,2-dioleoyl-sn-glycerol-3-phosphatidylserine | 1.6429121<br>75 | 1.42421488<br>6 | 0.0381861<br>97 | Lipids and lipid-like molecules         | Glycerophospholipids                | up    |
| 21 | Cino vs NS | [M+Na] <sup>+</sup>         | Carbobenzoyloxy-L-norvalyl-L-norleucine       | 1.3585169<br>85 | 0.33481677<br>5 | 2.51373E-05     | Organic acids and derivatives           | Carboxylic acids and derivatives    | down  |
| 22 | Cino vs    | [M+H-C7                     | Benzamide                                     | 2.4906731       | 0.71193622      | 0.0001597       | Benzenoids                              | Benzene and                         | down  |

|    |            |                  |                                                |             |             |             |                                 |                                     |      |
|----|------------|------------------|------------------------------------------------|-------------|-------------|-------------|---------------------------------|-------------------------------------|------|
|    | NS         | H4O2]+           |                                                | 99          | 5           | 71          |                                 | substituted derivatives             |      |
| 23 | Cino vs NS | [M+H]+           | 7-hydroxymitragnine                            | 1.726065093 | 0.388817251 | 0.001310844 | /                               | /                                   | down |
| 24 | Cino vs NS | [M+H-CH4O3]+     | Trans-traumatic acid                           | 1.228856273 | 0.802101086 | 0.0046496   | Lipids and lipid-like molecules | Fatty Acyls                         | down |
| 25 | Cino vs NS | [M+H]+           | Hyocholic acid                                 | 1.334863574 | 0.75217707  | 0.007237167 | Lipids and lipid-like molecules | Stero/ids and steroid derivatives   | down |
| 26 | Cino vs NS | [M+H]+           | Pentaethylene glycol                           | 1.681442078 | 1.525547777 | 0.008886735 | Organic oxygen compounds        | Organooxygen compounds              | up   |
| 27 | Cino vs NS | M+               | Trigonelline                                   | 4.502426392 | 1.320183238 | 0.009900842 | Alkaloids and derivatives       |                                     | up   |
| 28 | Cino vs NS | M+               | 1-Methylnicotinamide                           | 12.07074518 | 0.819617274 | 0.010302756 | Organoheterocyclic compounds    | Pyridines and derivatives           | down |
| 29 | Cino vs NS | [M+H]+           | Zectran                                        | 2.558000856 | 1.226754954 | 0.019773551 | Benzenoids                      | Benzene and substituted derivatives | up   |
| 30 | Cino vs NS | [M+H]+           | Tris(hydroxymethyl)aminomethane                | 1.597593336 | 1.129812923 | 0.023314582 | Organic nitrogen compounds      | Organonitrogen compounds            | up   |
| 31 | Cino vs NS | [M+H-C6H8O]+     | 1-(cyclopentylcarbonyl)-4-piperidinamine       | 1.332984509 | 0.327797998 | 0.026258287 | Organoheterocyclic compounds    | Piperidines                         | down |
| 32 | Cino vs NS | [M+H]+           | Erucamide                                      | 4.268245997 | 1.349486659 | 0.040155258 | Lipids and lipid-like molecules | Fatty Acyls                         | up   |
| 33 | Cino vs NS | [M+H-C4H11N]+    | Diethylcarbamazine                             | 1.274715377 | 1.591059019 | 0.043129917 | Organoheterocyclic compounds    | Diazinanes                          | up   |
| 34 | Mix vs NS  | [M+Na]+          | Carbobenzyloxy-L-norvalyl-L-norleucine         | 1.427974828 | 0.201760278 | 4.45537E-06 | Organic acids and derivatives   | Carboxylic acids and derivatives    | down |
| 35 | Mix vs NS  | (M+H)+           | 1,2-dioleoyl-sn-glycerol-3-phosphatidylcholine | 6.284527652 | 0.824330903 | 6.52656E-05 | /                               | /                                   | down |
| 36 | Mix vs NS  | [M+H]+           | 7-hydroxymitragnine                            | 1.893446977 | 0.168298037 | 0.000145617 | /                               | /                                   | down |
| 37 | Mix vs NS  | [M+H-C7H13NO2]+  | Dodecanoic acid                                | 2.011373384 | 1.391568071 | 0.000148739 | Lipids and lipid-like molecules | Fatty Acyls                         | up   |
| 38 | Mix vs NS  | [M+H-3H2O]+      | 3-hydroxydodecanoic acid                       | 1.506076693 | 1.509538426 | 0.000238821 | Organic acids and derivatives   | Hydroxy acids and derivatives       | up   |
| 39 | Mix vs NS  | [M+H-NH3]+       | Phenylethylamine                               | 4.697021056 | 1.373368003 | 0.000920221 | Benzenoids                      | Benzene and substituted derivatives | up   |
| 40 | Mix vs NS  | [M+H-C11H17O2N]+ | Benzeneethanamine                              | 3.062304856 | 1.376871326 | 0.001147506 | Benzenoids                      | Benzene and substituted derivatives | up   |
| 41 | Mix vs NS  | [M+H]+           | 4'-o-.beta.-d-glucosyl-5-o-methylvisamminol    | 1.446148541 | 1.629351405 | 0.001235892 | Organoheterocyclic compounds    | Benzopyrans                         | up   |
| 42 | Mix vs NS  | (M+H-H2O)+       | 3-Amino-3-(4-hydroxyphenyl)propionate          | 1.051752504 | 1.851242739 | 0.001656808 | /                               | /                                   | up   |
| 43 | Mix vs NS  | [M+H]+           | 3,4-dimethylbenzaldehyde                       | 2.213559503 | 1.365042922 | 0.002620174 | Benzenoids                      | Benzene and substituted derivatives | up   |
| 44 | Mix vs NS  | [M+H-H2O]+       | Benzyl alcohol                                 | 1.721799434 | 1.281453221 | 0.002644125 | Benzenoids                      | Benzene and substituted derivatives | up   |
| 45 | Mix vs NS  | [M+H-C6H12O]+    | Zerumbone                                      | 4.29158083  | 1.389182549 | 0.002723672 | Lipids and lipid-like molecules | Prenol lipids                       | up   |
| 46 | Mix vs NS  | [M+H]+           | Norvaline                                      | 1.856377978 | 1.285771303 | 0.002997729 | Organic acids and derivatives   | Carboxylic acids and derivatives    | up   |
| 47 | Mix vs NS  | [M+H]+           | 2,5-di-tert-butyl-1,4-benzoquinone             | 1.790282994 | 2.068603292 | 0.003331879 | Organic oxygen compounds        | Organooxygen compounds              | up   |

|    |           |                            |                                                                                                  |             |             |             |                                         |                                     |      |
|----|-----------|----------------------------|--------------------------------------------------------------------------------------------------|-------------|-------------|-------------|-----------------------------------------|-------------------------------------|------|
| 48 | Mix vs NS | [M+H] <sup>+</sup>         | Ropinirole                                                                                       | 1.594695868 | 1.49244996  | 0.003657843 | Organoheterocyclic compounds            | Indoles and derivatives             | up   |
| 49 | Mix vs NS | [M+H] <sup>+</sup>         | Eprosartan                                                                                       | 1.48355726  | 1.537431138 | 0.004627101 | Benzenoids                              | Benzene and substituted derivatives | up   |
| 50 | Mix vs NS | [M+H-H2O] <sup>+</sup>     | 1-stearoyl-2-linoleoyl-sn-glycerol                                                               | 1.312585783 | 0.761847751 | 0.006412221 | Lipids and lipid-like molecules         | Fatty Acyls                         | down |
| 51 | Mix vs NS | [M+H] <sup>+</sup>         | Heptadecaspheinganine                                                                            | 4.675512738 | 1.485856454 | 0.006496494 | Organic nitrogen compounds              | Organonitrogen compounds            | up   |
| 52 | Mix vs NS | [M+H] <sup>+</sup>         | 1-methyl-4-benzylpiperazine                                                                      | 1.16426828  | 1.542649532 | 0.009278051 | Benzenoids                              | Benzene and substituted derivatives | up   |
| 53 | Mix vs NS | [M+H-C6H11NO] <sup>+</sup> | L-leucyl-L-leucine methyl ester                                                                  | 1.832869864 | 1.877710068 | 0.010585838 | Organic acids and derivatives           | Carboxylic acids and derivatives    | up   |
| 54 | Mix vs NS | [M+H-H2O] <sup>+</sup>     | Exo-norborneol                                                                                   | 1.171385406 | 1.183553817 | 0.010613104 | Lipids and lipid-like molecules         | Prenol lipids                       | up   |
| 55 | Mix vs NS | [M+H] <sup>+</sup>         | L-serine methyl ester                                                                            | 1.747456322 | 1.722573203 | 0.01118915  | Organic acids and derivatives           | Carboxylic acids and derivatives    | up   |
| 56 | Mix vs NS | [M+H] <sup>+</sup>         | Leu-Ala                                                                                          | 1.727767618 | 2.565314868 | 0.011336122 | Organic acids and derivatives           | Carboxylic acids and derivatives    | up   |
| 57 | Mix vs NS | [M+H] <sup>+</sup>         | Methyltyrosinate                                                                                 | 1.612034157 | 2.505680244 | 0.012347015 | Organic acids and derivatives           | Carboxylic acids and derivatives    | up   |
| 58 | Mix vs NS | [M+H] <sup>+</sup>         | $\alpha$ -linolenic acid                                                                         | 2.122515214 | 1.58454642  | 0.016772588 | Lipids and lipid-like molecules         | Fatty Acyls                         | up   |
| 59 | Mix vs NS | [M+H] <sup>+</sup>         | 5-methylcytidine                                                                                 | 6.013456579 | 2.19578021  | 0.020652219 | Nucleosides, nucleotides, and analogues | Pyrimidine nucleosides              | up   |
| 60 | Mix vs NS | [M+NH4] <sup>+</sup>       | 9,12-octadecadiynoic acid                                                                        | 2.874831884 | 1.754476457 | 0.022890149 | Lipids and lipid-like molecules         | Fatty Acyls                         | up   |
| 61 | Mix vs NS | [M+H] <sup>+</sup>         | Benzimidazole                                                                                    | 1.02167982  | 1.176313559 | 0.022891643 |                                         | /                                   | up   |
| 62 | Mix vs NS | [M+H] <sup>+</sup>         | Melamine                                                                                         | 1.161084789 | 1.690624866 | 0.027740005 | Organoheterocyclic compounds            | Triazines                           | up   |
| 63 | Mix vs NS | [M+H] <sup>+</sup>         | Pipamperone                                                                                      | 2.287747858 | 2.37423784  | 0.027790609 | Organic oxygen compounds                | Organooxygen compounds              | up   |
| 64 | Mix vs NS | [M+H] <sup>+</sup>         | Chenodeoxycholate                                                                                | 1.480009647 | 2.14394956  | 0.037745367 | Lipids and lipid-like molecules         | Steroids and steroid derivatives    | up   |
| 65 | Mix vs NS | [M+H-2H2O] <sup>+</sup>    | 17-octadecynoic acid                                                                             | 1.086115355 | 1.220153034 | 0.041789498 | Lipids and lipid-like molecules         | Fatty Acyls                         | up   |
| 66 | Mix vs NS | [M+H] <sup>+</sup>         | Erucamide                                                                                        | 3.670870785 | 1.534737462 | 0.047096049 | Lipids and lipid-like molecules         | Fatty Acyls                         | up   |
| 67 | Mix vs NS | [M-H] <sup>-</sup>         | Valeric acid                                                                                     | 2.663097486 | 2.660455077 | 0.000214786 | Lipids and lipid-like molecules         | Fatty Acyls                         | up   |
| 68 | Mix vs NS | [M-H] <sup>-</sup>         | Thymol-beta-D-glucoside                                                                          | 5.384681197 | 1.878799394 | 0.001766187 | Lipids and lipid-like molecules         | Prenol lipids                       | up   |
| 69 | Mix vs NS | [M-H] <sup>-</sup>         | [(4E)-7-acetyloxy-6-hydroxy-2-methyl-10-oxo-2,3,6,7,8,9-hexahydrooxecicin-3-yl] (E)-but-2-enoate | 1.122046262 | 1.806634148 | 0.00192566  | Organic acids and derivatives           | Carboxylic acids and derivatives    | up   |
| 70 | Mix vs NS | [M-H] <sup>-</sup>         | 18-carboxydinorlinoleukotriene b4                                                                | 1.049090033 | 1.906441424 | 0.002839324 | Lipids and lipid-like molecules         | Fatty Acyls                         | up   |
| 71 | Mix vs NS | [M-H] <sup>-</sup>         | Ostruthin                                                                                        | 2.190803297 | 1.9379619   | 0.003433409 | Lipids and lipid-like molecules         | Prenol lipids                       | up   |
| 72 | Mix vs NS | [M-H] <sup>-</sup>         | 16-phenoxytetranorprostaglandin a2                                                               | 1.717056289 | 2.233180547 | 0.003732374 | Lipids and lipid-like molecules         | Fatty Acyls                         | up   |
| 73 | Mix vs NS | [M-H] <sup>-</sup>         | Gly-His-Lys                                                                                      | 9.151828421 | 1.786105705 | 0.005017745 | Organic acids and derivatives           | Carboxylic acids and derivatives    | up   |
| 74 | Mix vs NS | [M-H] <sup>-</sup>         | Acetic acid                                                                                      | 2.480761818 | 1.988144591 | 0.005079202 | Benzenoids                              | Benzene and substituted             | up   |

|    |              |                             |                                                        |                 |                 |                 |                                     |                                                          |      |
|----|--------------|-----------------------------|--------------------------------------------------------|-----------------|-----------------|-----------------|-------------------------------------|----------------------------------------------------------|------|
| 75 | Mix vs<br>NS | [M-H]-                      | Propanoic acid                                         | 1.2979568<br>97 | 2.03745901<br>1 | 0.0053717<br>4  | Benzenoids                          | derivatives<br>Benzene and<br>substituted<br>derivatives | up   |
| 76 | Mix vs<br>NS | [M-H]-                      | Rauwolschine                                           | 2.5438411<br>77 | 1.92016760<br>1 | 0.0054357<br>84 | /                                   | /                                                        | up   |
| 77 | Mix vs<br>NS | [M-H]-                      | Butyric acid                                           | 1.2267316<br>91 | 1.98763291<br>6 | 0.0058458<br>15 | /                                   | /                                                        | up   |
| 78 | Mix vs<br>NS | [M-H]-                      | Lumichrome                                             | 1.1660251<br>1  | 1.91541192<br>5 | 0.0061053<br>96 | Organoheterocyclic<br>compounds     | Pteridines and<br>derivatives                            | up   |
| 79 | Mix vs<br>NS | [M-H]-                      | Hydroquinidine                                         | 7.7047397<br>25 | 1.76270364<br>9 | 0.0061607<br>9  | /                                   | /                                                        | up   |
| 80 | Mix vs<br>NS | [M-H]-                      | Isoimperatorin                                         | 1.1244362<br>77 | 1.86749746<br>3 | 0.0073154<br>04 | Phenylpropanoids and<br>polyketides | Coumarins and<br>derivatives                             | up   |
| 81 | Mix vs<br>NS | [M-H-H <sub>2</sub> O<br>]- | 16-phenyltetranor<br>prostaglandin<br>f2.alpha.        | 2.8224497<br>07 | 2.04408736<br>2 | 0.0107064<br>27 | Lipids and lipid-like<br>molecules  | Fatty Acyls                                              | up   |
| 82 | Mix vs<br>NS | [M-H]-                      | P-toluenesulfonic<br>acid                              | 1.9589496<br>97 | 1.88570380<br>4 | 0.0119158<br>21 | Benzenoids                          | Benzene and<br>substituted<br>derivatives                | up   |
| 83 | Mix vs<br>NS | [M-H]-                      | 2,6'-dimethoxy-2<br>'-hydroxychalcon<br>e              | 1.0830322<br>24 | 1.83716964<br>3 | 0.0124808<br>37 | Phenylpropanoids and<br>polyketides | Linear<br>1,3-diarylpropanoid<br>s                       | up   |
| 84 | Mix vs<br>NS | [M-H]-                      | Picein                                                 | 1.0664946<br>69 | 1.88547817<br>8 | 0.0127381<br>34 | Organic oxygen<br>compounds         | Organooxygen<br>compounds                                | up   |
| 85 | Mix vs<br>NS | [M-H]-                      | 9-phenyl-1-(2,4,6<br>-trihydroxyphenyl<br>)nonan-1-one | 2.3334948<br>85 | 2.01229490<br>5 | 0.0168254<br>85 | Organic oxygen<br>compounds         | Organooxygen<br>compounds                                | up   |
| 86 | Mix vs<br>NS | [M-H]-                      | Pg 42:11                                               | 1.0181456<br>24 | 0.50210139<br>8 | 0.0216202<br>03 | Lipids and lipid-like<br>molecules  | Glycerophospholipi<br>ds                                 | down |
| 87 | Mix vs<br>NS | [M-H]-                      | Isovaleric acid                                        | 1.6886163<br>57 | 2.27926460<br>6 | 0.0346842<br>81 | Lipids and lipid-like<br>molecules  | Fatty Acyls                                              | up   |
| 88 | Mix vs<br>NS | [M-H]-                      | Cis-7,10,13,16-do<br>cosatetraenoic<br>acid            | 2.0094898<br>27 | 1.41954477<br>7 | 0.0355967<br>07 | Lipids and lipid-like<br>molecules  | Fatty Acyls                                              | up   |
| 89 | Mix vs<br>NS | [M-H]-                      | 3-hydroxybenzald<br>ehyde                              | 2.8151791<br>23 | 0.58247410<br>4 | 0.0436067<br>23 | Organic oxygen<br>compounds         | Organooxygen<br>compounds                                | down |

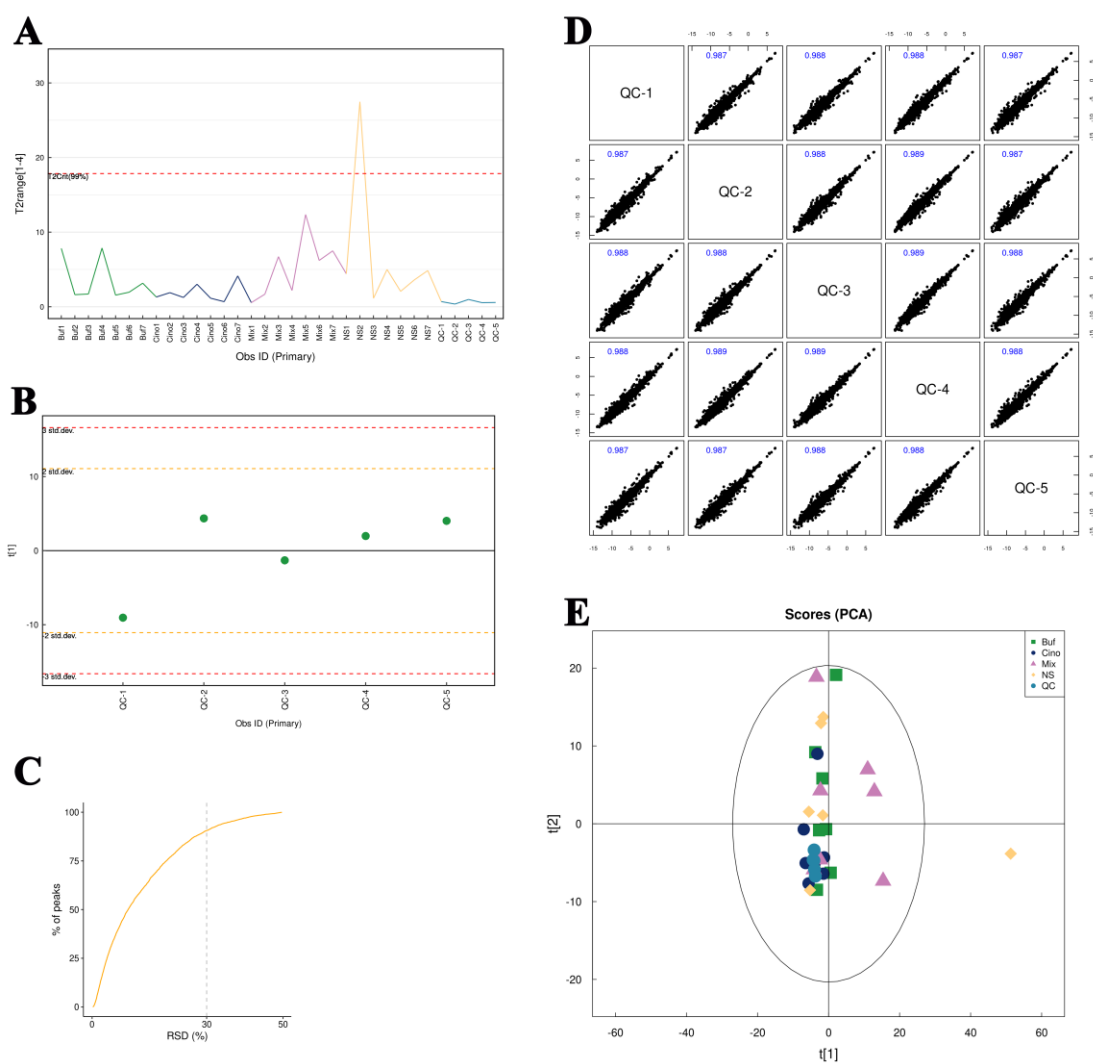

**Figure S1.** Results of quality control. **A** Hotelling's T2 test for the total sample in negative mode. **B** Multivariate control chart of QC samples in negative mode. **C** Relative standard deviation of QC samples in negative mode. **D** Pearson correlation analysis of QC samples in negative mode. **E** Principal component analysis of QC samples in negative mode.

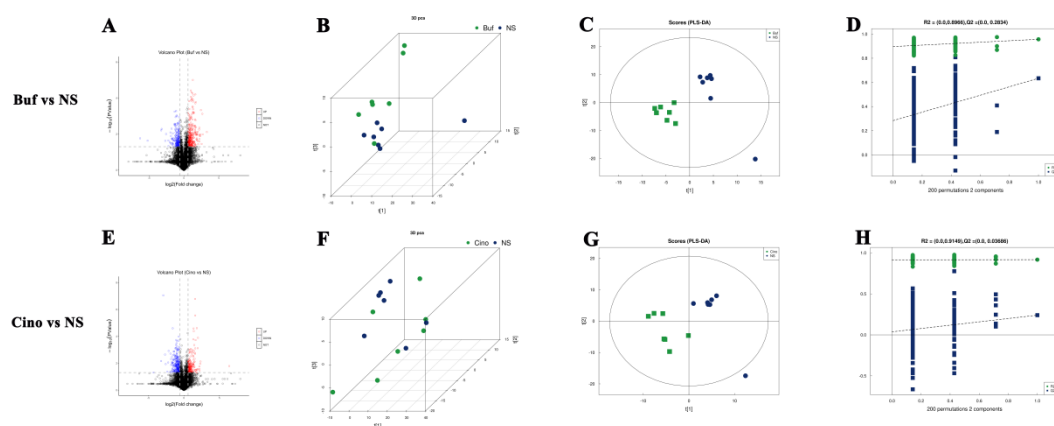

**Figure S2.** **A** and **E** Volcanograms showing up- and down-regulated metabolites between NS and Buf, NS and Cino group, respectively. Blue color indicates down-regulated metabolites, while red color represents up-regulated metabolites. **B** and **F** Score plot of 3D principal component analysis between NS and Buf, NS and Cino group, respectively. **C** and **G** Score plot of partial least-squares discriminant analysis between NS and Buf, NS and Cino group, respectively. **D** and **H** Corresponding validation plot between NS and Buf, NS and Cino group, respectively.

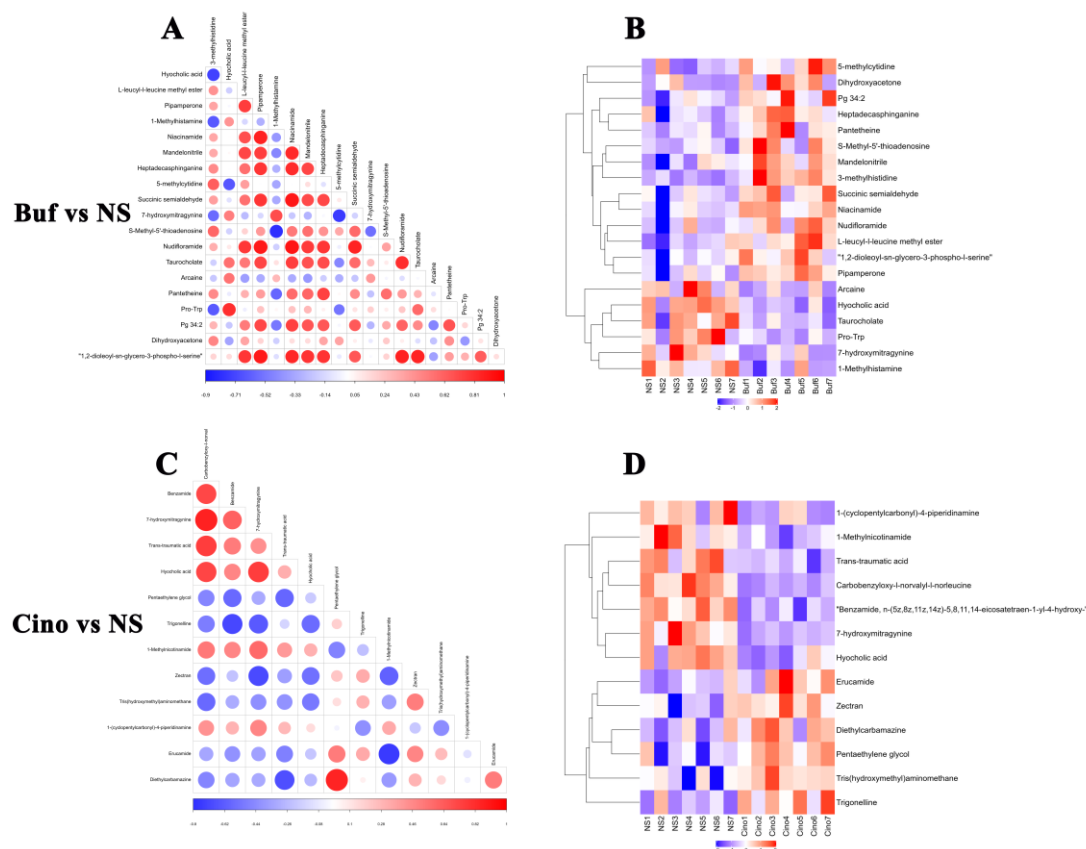

**Figure S3. A and C** Correlation analysis of differential metabolites between NS and Bufer, NS and Cino group, respectively. Red color indicates positive correlation and blue color indicates negative correlation. The higher the value, the stronger the correlation between the two metabolites. **B and D** Heatmap analysis of differential metabolites between NS and Bufer, NS and Cino group, respectively. Red color indicates higher concentration of differential metabolites, blue color indicates lower concentration of differential metabolites.

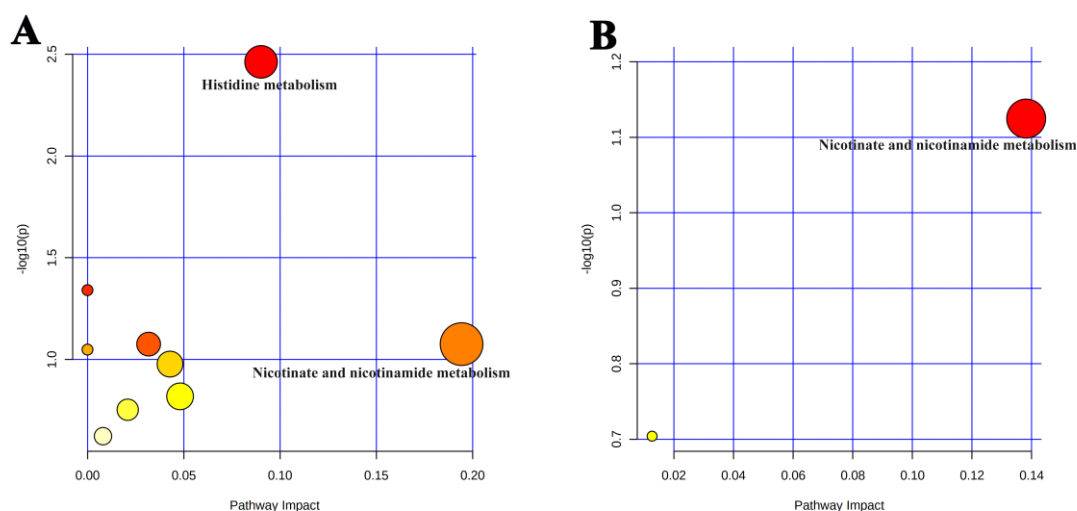

**Figure S4. A-B** Metabolic pathway of differential metabolites between NS and Bufer, NS and Cino group enriched by MetaboAnalyst 5.0.
